# Supplementary material for: Human Health Risk Assessment from Lead Exposure through Consumption of Raw Cow Milk from Free-Range Cattle Reared in the Vicinity of a Lead–Zinc Mine in Kabwe
Source: MDPI journal article supplement (doi:10.3390/ijerph19084757), 2022-04-14
Supplement: s1 [file s1]

## Supplementary Information

**Table S1:** Sampling locations in the study area of Kabwe and Chongwe (reference site)

**Table S2:** Microwave operating conditions for milk digestion

**Table S3:** Summary of Graphite furnace atomic absorption spectrophotometer (GFAAS)

**Table S4:** Analytical performances of lead

**Table S1:** Sampling locations in the study area of Kabwe and Chongwe (reference area)

| S/N | Region  | Sampling points | Latitude        | Longitude       | Description     |
|-----|---------|-----------------|-----------------|-----------------|-----------------|
| 1   | Kabwe   | B               | 14° 29' 25.727" | 28° 23' 23.928" | Mining area     |
| 3   | Kabwe   | D               | 14° 29' 45.200" | 28° 23' 21.371" | Mining area     |
| 2   | Kabwe   | F               | 14° 27' 55.479" | 28° 24' 27.828" | Mining area     |
| 4   | Kabwe   | G               | 14° 30' 44.226" | 28° 24' 53.634" | Mining area     |
| 5   | Kabwe   | H               | 14° 30' 21.985" | 28° 24' 17.223" | Mining area     |
| 6   | Kabwe   | I               | 14° 22' 9.7314" | 28° 34' 4.152"  | Mining area     |
| 7   | Kabwe   | J               | 14° 22' 26.400" | 28° 33' 32.400" | Mining area     |
| 8   | Kabwe   | K               | 14° 22' 48.216" | 28° 33' 45.931" | Mining area     |
| 9   | Kabwe   | L               | 14° 22' 58.079" | 28° 30' 25.848" | Mining area     |
| 10  | Kabwe   | M               | 14° 22' 39.356" | 28° 30' 21.854" | Mining area     |
| 11  | Kabwe   | N               | 14° 33' 35.964" | 28° 30' 36.503" | Mining area     |
| 12  | Kabwe   | O               | 14° 33' 35.099" | 28° 31' 21.863" | Mining area     |
| 13  | Kabwe   | P               | 14° 33' 39.599" | 28° 30' 8.964"  | Mining area     |
| 14  | Kabwe   | Q               | 14° 23' 36.204" | 28° 24' 45.468" | Mining area     |
| 15  | Kabwe   | R               | 14° 23' 27.924" | 28° 24' 56.627" | Mining area     |
| 16  | Kabwe   | S               | 14° 23' 17.879" | 28° 24' 56.627" | Mining area     |
| 17  | Kabwe   | T               | 14° 23' 37.463" | 28° 24' 51.408" | Mining area     |
| 18  | Kabwe   | U               | 14° 26' 57.156" | 28° 22' 21.144" | Mining area     |
| 19  | Kabwe   | V               | 14° 26' 57.299" | 28° 22' 20.424" | Mining area     |
| 20  | Kabwe   | X               | 14° 27' 33.660" | 28° 20' 58.235" | Mining area     |
| 21  | Kabwe   | Y               | 14° 23' 36.852" | 28° 24' 18.179" | Mining area     |
| 22  | Chongwe | W               | 15° 14' 33.001" | 28° 37' 43.014" | Non-mining area |
| 23  | Chongwe | Z               | 15° 14' 38.616" | 28° 37' 41.439" | Non-mining area |
| 24  | Chongwe | ZZ              | 15° 15' 40.880" | 28° 37' 6.7184" | Non-mining area |

Table S2: Microwave operating conditions for milk digestion

| Step | Ramp (min) | Time (min) | Temperature (°C) |
|------|------------|------------|------------------|
| 1    | 5          | 5          | 160              |
| 2    | 1          | 10         | 190              |
| 3    |            | 10         | 75               |

Table S3: Summary of Graphite furnace atomic absorption spectrophotometer (GFAAS) operating conditions

| Parameter                                         | Operating conditions |
|---------------------------------------------------|----------------------|
| Wave length (nm)                                  | 283.3                |
| Slit Width (nm)                                   | 1.3                  |
| Time Constant (s)                                 | 0.1                  |
| Lamp Voltage (V)                                  | 7.5                  |
| PMT Voltage (V)                                   | 298                  |
| Carrier gas /Ar (%)                               | 99.999               |
| Modifier (NH <sub>4</sub> PO <sub>4</sub> ) (w/w) | 0.5                  |
| Volume of sample (μL)                             | 20                   |
| Volume of modifier (μL)                           | 20                   |
| Graphite tube                                     | PyroTubeHR           |
| Single Mode                                       | BKG Correction       |
| Background correction                             | Zeeman effect        |

Table S4 : Analytical performances of lead

| Parameter                       | Value  |
|---------------------------------|--------|
| Certified value (μg/g)          | 0.0053 |
| Measured Value (μg/g)           | 0.0059 |
| Standard Error (SE)             | 0.014  |
| Standard Deviation (SD)         | 0.040  |
| Limit of detection (LOD = μg/g) | 0.130  |

|                                                      |       |
|------------------------------------------------------|-------|
| Limit of quantitation (LOQ = $\mu\text{g/g}$ )       | 0.400 |
| Slope (Sensitivity)                                  | 0.107 |
| Intercept                                            | 0.001 |
| Limit of decision                                    | 0.066 |
| Linearity (working range, $\mu\text{g/g}$ )          | 0.120 |
| Mean recovery rate ( $\bar{X} \pm \text{SD}$ , n= 8) | 119.8 |
| Correlation coefficient                              | 0.999 |

---
